# Supplementary material for: Cu–ZnO nanoparticles encapsulated in ZSM-5 for selective conversion of carbon dioxide into oxygenates
Source: Royal Society of Chemistry journal article supplement (doi:10.1039/d4ey00273c), 2025-01-01
Supplement: d4ey00273c1.pdf [file d4ey00273c1.pdf]

**Supplementary Information**

**Cu-ZnO nanoparticles encapsulated with ZSM-5 for selective conversion of  
carbon dioxide to oxygenates**

**Xu Wang<sup>a,b</sup>, Hwi Yeon Woo<sup>a</sup>, Dongming Shen<sup>a</sup>, Min Jung Park<sup>a</sup>, Mansoor Ali<sup>a</sup>, Faisal  
Zafar<sup>a</sup>, Kyun Yeon Kang<sup>c</sup>, Jae-Soon Choi<sup>c</sup>, Eunjoo Jang<sup>d,\*</sup>, Jong Wook Bae<sup>a,\*</sup>**

<sup>a</sup>School of Chemical Engineering, Sungkyunkwan University (SKKU), 2066 Seobu-ro,  
Jangan-gu, Suwon, Gyeonggi-do 16419, Republic of Korea

<sup>b</sup>Institute of Advanced Study, Chengdu University, Chengdu 610106, China

<sup>c</sup>LG Chem., 188 Moonji-ro, Yuseong-gu, Daejeon, 34122, Republic of Korea

<sup>d</sup>SKKU Advanced Institute of Nanotechnology (SAINT), Sungkyunkwan University (SKKU),  
2066 Seobu-ro, Jangan-gu, Suwon, Gyeonggi-do 16419, Republic of Korea

---

\*Corresponding author (E. Jang): Tel.: +82-31-299-4318; Fax: +82-31-299-4119; E-mail  
address: [ejjang1201@skku.edu](mailto:ejjang1201@skku.edu)

\*Corresponding author (J.W. Bae): Tel.: +82-31-290-7347; Fax: +82-31-290-7272; E-mail  
address: [finejw@skku.edu](mailto:finejw@skku.edu)

## Materials

The copper (II) nitrate ( $\text{Cu}(\text{NO}_3)_2 \cdot 3\text{H}_2\text{O}$ ), tetrapropyl ammonium hydroxide (TPAOH) (40 wt.%), polyethylene glycol hexadecyl ether, Polyoxyethylene (10) ceetyl ether (Brij-C10) were purchased from Sigma-Aldrich. The tetraethyl orthosilicate (TEOS), aqueous ammonium hydroxide (~28%), aluminum nitrate ( $\text{Al}(\text{NO}_3)_3 \cdot 9\text{H}_2\text{O}$ ) were purchased from Daejung Chemicals. Besides, the cyclohexane and zinc nitrate hexahydrate ( $\text{Zn}(\text{NO}_3)_2 \cdot 6\text{H}_2\text{O}$ ) were obtained from Samchun Chemicals and Duksan Pure Chemicals respectively.

## Supplementary methods

Conversion of  $\text{CO}_2$  ( $X_{\text{CO}_2}$ ) and product distributions ( $S_j$ ) with a unit of mol% on the hybrid CZ(x)@Z(y)-t catalysts were calculated by using the following separate equations of (1) and (2), where N stands for an inlet and outlet mole of  $\text{CO}_2$  reactant (i) and products (j) such as DME, methanol, and hydrocarbons.

$$X_{\text{CO}_2} = (1 - N_{i,\text{out}}/N_{i,\text{in}}) \times 100\% \text{ ----- (1)}$$

$$S_j = (N_j/(N_{i,\text{in}} - N_{i,\text{out}})) \times 100\% \text{ ----- (2)}$$

Turnover frequency (TOF ( $\text{h}^{-1}$ )) of  $\text{CO}_2$  conversion was calculated according to the equation (3), where SV represents space velocity (3000 mL/g/h),  $M_{\text{cat}}$  represents catalyst amount of CZ(x)@Z(y)-t (0.2 g),  $W_{\text{CuO}}$  stands for CuO content in the CZ@Z catalysts determined by XRF analysis, and  $N_{\text{Cu}}$  stands for the active copper composition which was estimated from  $\text{H}_2$ -TPR analysis (50 - 410 °C). Space-time yield (STY,  $\text{g}/(\text{g}_{\text{Cu}} \cdot \text{h})$ ) was calculated according to the average of Cu content in the catalyst.

$$\text{TOF} = ((\text{SV} \times M_{\text{cat}} \times 24.0\% \times X_{\text{CO}_2}) / (22.4 \times 10^3)) / ((M_{\text{cat}} \times W_{\text{Cu}} \times N_{\text{Cu}}) / 63.546) \text{ ----- (3)}$$

$$\text{STY} = (\text{SV} / 22.4 \times 24.0\% \times X_{\text{CO}_2} \times S_{\text{DME}} \times 46.07) / (W_{\text{CuO}} \times 63.546 / 79.545) \text{ ----- (4)}$$

## Figure Captions

**Figure S1.** Particle size distribution of the fresh Cu-ZnO nanoparticles encapsulated in SiO<sub>2</sub>, (a) CZ(1.25)@Si, (b) CZ(0.9)@Z(60)-12, (c) CZ(0.9)@Z(60)-24 and (d) CZ(0.9)@Z(60)-48 based on the TEM images in **Figure 3**.

**Figure S2.** HAADF images and EDS elemental mapping results of the fresh CZ(0.9)@Z(60)-24 catalyst (a) Local area of Cu-ZnO nanoparticles and (b) Entire CZ(0.9)@Z(60)-24 particle.

**Figure S3.** TEM image and size distribution of the used CZ(0.9)@Z(60)-24 catalyst after 100 h reaction.

**Figure S4.** TEM image and EDS elemental mapping results of the used CZ(0.9)@Z(60)-24 catalyst after 100 h reaction.

**Figure S5.** Py-IR spectra of the fresh CZ(0.9)@Z(60)-t catalysts (t = 12, 24, and 48 h)

**Figure S6.** EPR spectra of the fresh CZ(0.9)@Z(60)-t catalysts (t = 12, 24, and 48 h).

**Figure S7.** Catalytic activity with time-on-stream (TOS) on all the CZ(x)@Z(y)-t catalysts such as CO<sub>2</sub> conversion and product distribution measured at the reaction condition of T = 260 °C, P = 5.0 MPa, space velocity (SV) = 3000 mL/(g<sub>cat</sub>·h) and a feed gas composition of CO<sub>2</sub>/H<sub>2</sub>/N<sub>2</sub> = 72/24/4.

**Table S1.** Summarized results of bulk composition and surface properties such as reducibility, acidic and basic sites of the CZ(x)@Z(y)-t catalysts.

**Table S2.** Comparisons of catalytic activity of the CZ(0.9)@Z(60)-24 with previously reports concerning CO<sub>2</sub> hydrogenation.

**Table S3.** Catalytic performances of the hybridized reference CZ@Si and ZSM-5 catalysts with different preparation methods

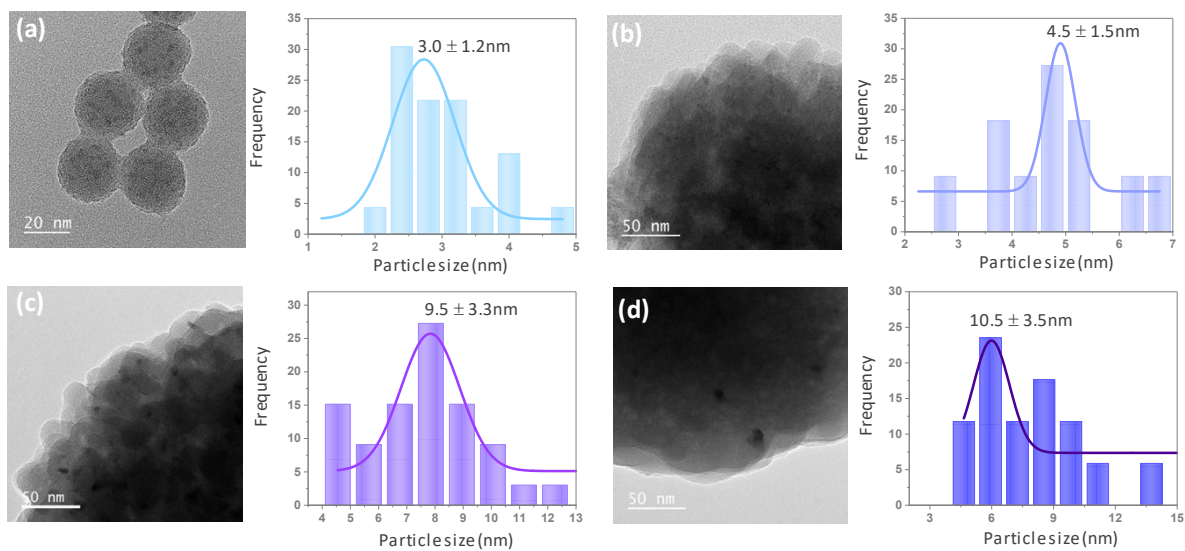

**Figure S1.** Particle size distribution of the fresh Cu-ZnO nanoparticles encapsulated in SiO<sub>2</sub>, (a) CZ(1.25)@Si, (b) CZ(0.9)@Z(60)-12, (c) CZ(0.9)@Z(60)-24 and (d) CZ(0.9)@Z(60)-48 based on the TEM images in **Figure 3**.

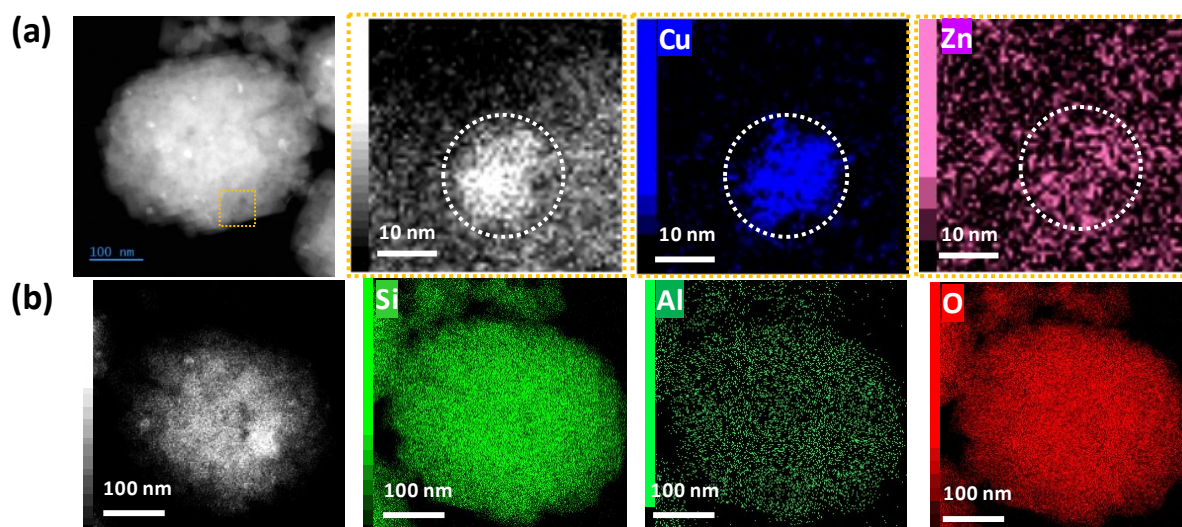

**Figure S2.** HADF images and EDS elemental mapping results of the fresh CZ(0.9)@Z(60)-24 catalyst (a) Local area of Cu-ZnO nanoparticles and (b) Entire CZ(0.9)@Z(60)-24 particle.

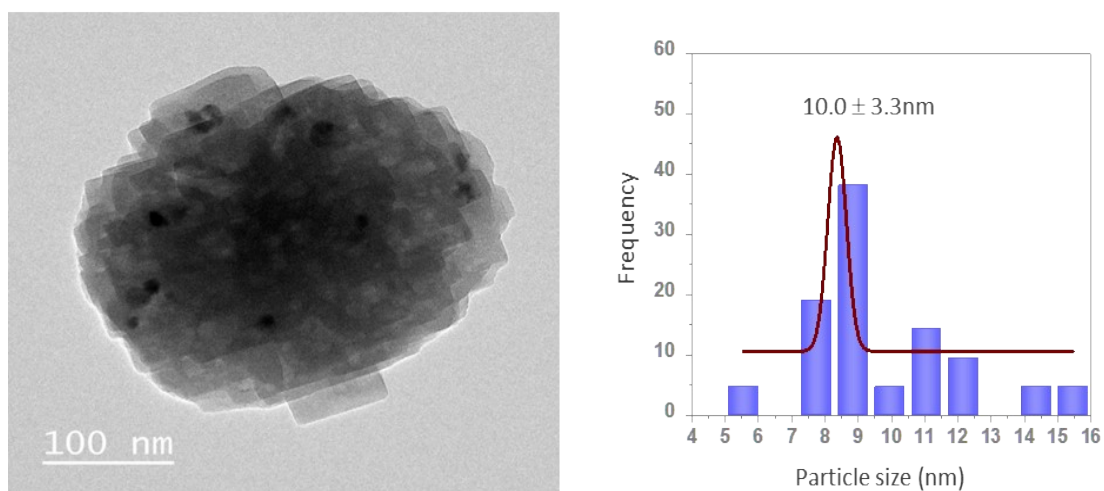

**Figure S3.** TEM image and size distribution of the used CZ(0.9)@Z(60)-24 catalyst after 100 h reaction.

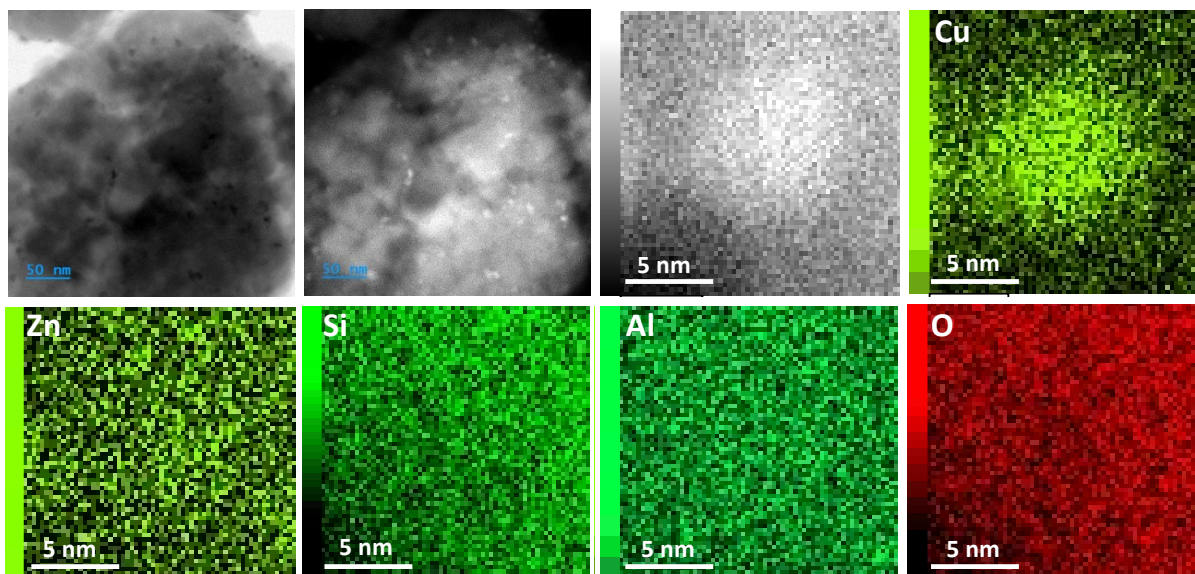

**Figure S4.** TEM image and EDS elemental mapping results of the used CZ(0.9)@Z(60)-24 catalyst after 100 h reaction.

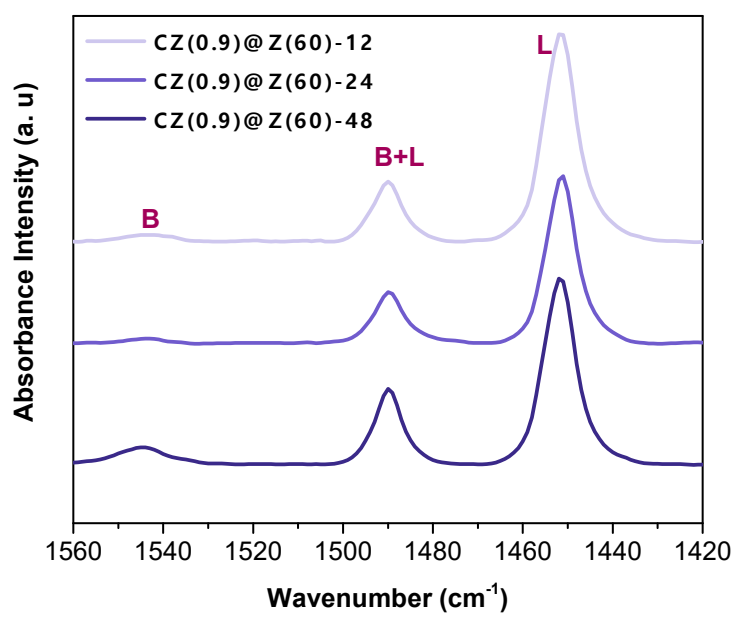

**Figure S5.** Py-IR spectra of the fresh CZ(0.9)@Z(60)-t catalysts (t = 12, 24, and 48 h).



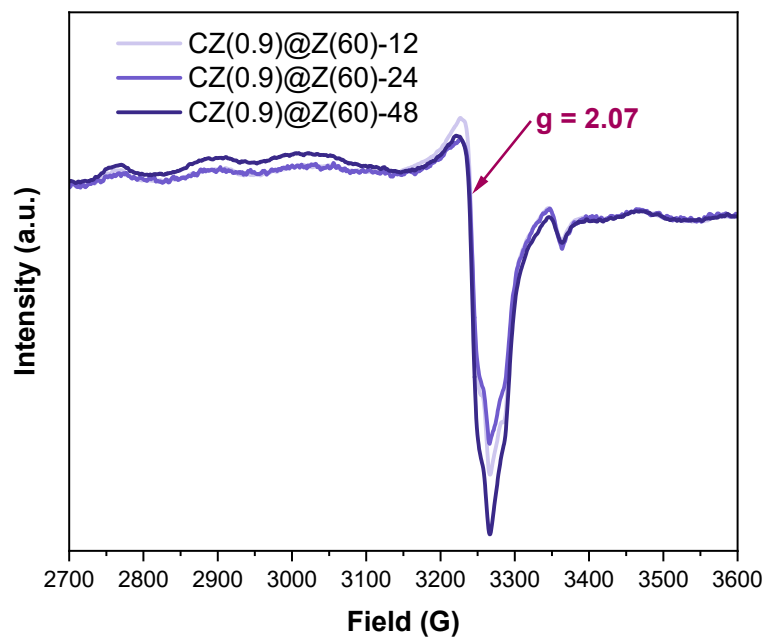

**Figure S6.** EPR spectra of the fresh CZ(0.9)@Z(60)-t catalysts (t = 12, 24, and 48 h).

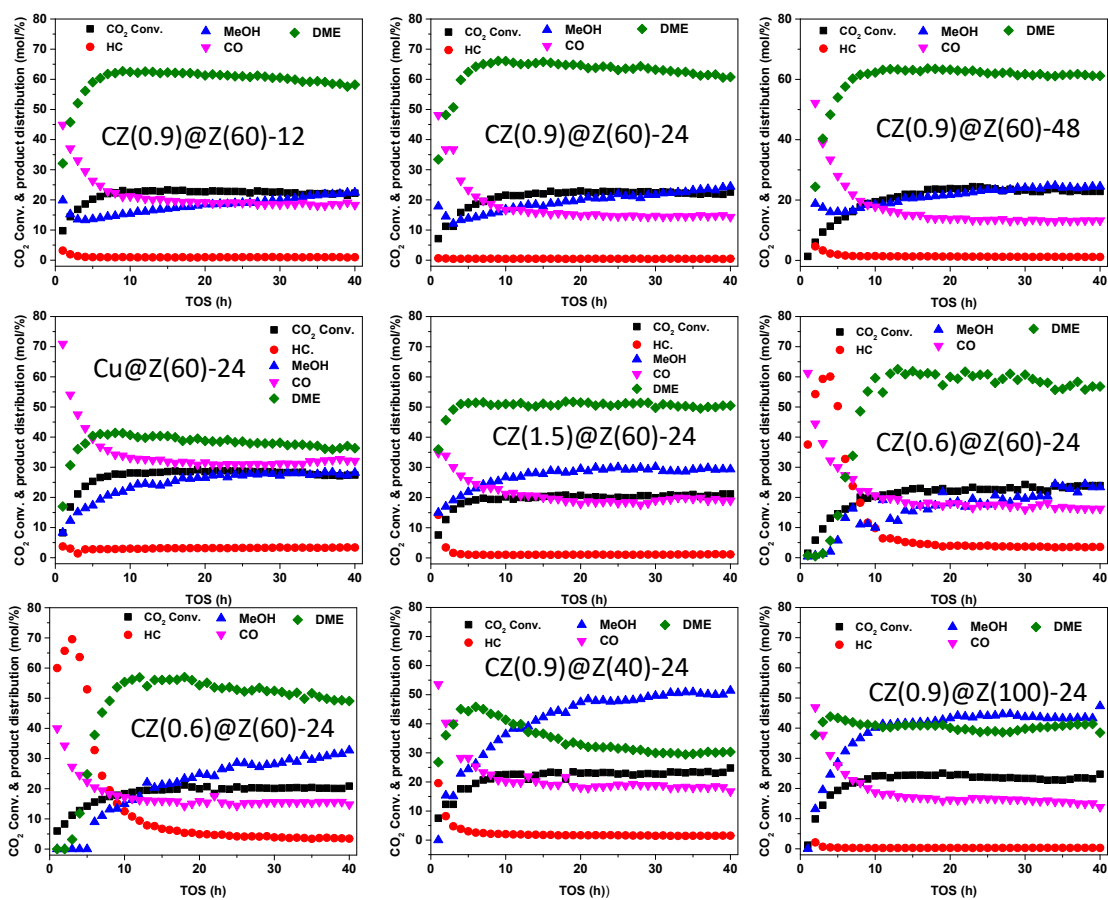

**Figure S7.** Catalytic activity with time-on-stream (TOS) on all the CZ(x)@Z(y)-t catalysts such as CO<sub>2</sub> conversion and product distribution measured at the reaction condition of T = 260 °C, P = 5.0 MPa, space velocity (SV) = 3000 mL/(g<sub>cat</sub>·h) and a feed gas composition of CO<sub>2</sub>/H<sub>2</sub>/N<sub>2</sub> = 72/24/4.

**Table S1.** Summarized results of bulk composition and surface properties such as reducibility, acidic and basic sites of the CZ(x)@Z(y)-t catalysts.

| Catalyst <sup>a</sup> | XRF compound weight (wt.%) <sup>b</sup>                  | TPR <sup>c</sup>                                                           | NH <sub>3</sub> -TPD <sup>d</sup> | CO <sub>2</sub> -TPD <sup>e</sup> | XPS <sup>f</sup>                       |
|-----------------------|----------------------------------------------------------|----------------------------------------------------------------------------|-----------------------------------|-----------------------------------|----------------------------------------|
|                       | CuO/ZnO/SiO <sub>2</sub> /Al <sub>2</sub> O <sub>3</sub> | H <sub>2</sub> consumption (mmol/g) [ $\alpha/\beta/\gamma/\delta$ /Total] | W/M/S(total) (mmol/g)             | W/M/S(total) ((mmol/g)            | Surface atomic content (Cu/Zn/Si/Al/O) |
| CZ(0.9)@Z(60)-12      | 2.16/2.50/94.19/1.16                                     | 0.095/0.131/0.184/0.391/0.801                                              | 0.584/0.256/0.218 (1.058)         | 0.284/0.258/0.112 (0.654)         | 0.60/0.56/29.1/1.04/68.7               |
| CZ(0.9)@Z(60)-24      | 1.72/2.16/94.73/1.39                                     | 0.052/0.120/0.154/0.354/0.680                                              | 0.418/0.233/0.105 (0.819)         | 0.250/0.158/0.118 (0.526)         | 0.36/0.74/26.5/1.50/70.9               |
| CZ(0.9)@Z(60)-48      | 1.11/2.21/95.32/1.36                                     | 0.060/0.128/0.097/0.304/0.589                                              | 0.340/0.135/0.078 (0.553)         | 0.222/0.127/0.154 (0.503)         | 0.30/1.40/25.9/1.50/70.9               |
| Cu@Z(60)-24           | 5.77/-/92.90/1.33                                        | 0.320/1.022/0.916/0.635/2.893                                              | 0.238/0.044/0.101 (0.382)         | 0.473/0.266/0.227 (0.966)         | 2.70/-/27.2/0.60/69.5                  |
| CZ(0.9)@Z(40)-24      | 1.73/2.31/93.84/2.13                                     | -/0.256/0.385/0.143/0.784                                                  | 0.317/0.247/0.102 (0.666)         | 0.229/0.160/0.063 (0.453)         | -                                      |
| CZ(0.9)@Z(100)-24     | 1.75/2.46/95.00/0.80                                     | 0.105/0.233/0.250/0.218/0.806                                              | 0.257/0.135/0.075 (0.467)         | 0.551/0.267/0.042 (0.860)         | -                                      |
| CZ(0.3)@Z(60)-24      | 1.05/3.95/93.70/1.30                                     | 0.174/0.099/0.123/0.108/0.504                                              | 0.357/0.348/0.158 (0.863)         | 0.512/0.211/0.069 (0.792)         | -                                      |
| CZ(0.6)@Z(60)-24      | 1.51/3.21/93.99/1.30                                     | 0.153/0.176/0.211/0.223/0.763                                              | 0.294/0.230/0.138 (0.662)         | 0.472/0.405/0.169 (1.046)         | -                                      |
| CZ(1.5)@Z(60)-24      | 3.30/2.13/93.26/1.31                                     | 0.205/0.357/0.443/0.225/1.230                                              | 0.298/0.214/0.105 (0.617)         | 0.392/0.223/0.183 (0.798)         | -                                      |

<sup>a</sup>CZ(x)@Z(y)-t represents CuZnO nanoparticles encapsulated with ZSM5 shells prepared at different crystallization time (t=12, 24, 48 h), the Cu/Zn molar ratio (x = 0.3, 0.6, 0.9 and 1.5), and the Si/Al molar ratio (y = 40, 60 and 100). <sup>b</sup>Chemical composition (wt%) of Cu, Zn, Si and Al species obtained from XRF analysis. <sup>c</sup>Amount of H<sub>2</sub> consumption (mmol/g) was estimated by H<sub>2</sub>-TPR analysis with four different reduction peaks at 150 - 250 °C ( $\alpha$ ), 250 - 350 °C ( $\beta$ ), 350 - 400 °C ( $\gamma$ ) and >400 °C ( $\delta$ ). <sup>d</sup>Acidic sites measured by NH<sub>3</sub>-TPD analysis, categorized with weak (W), medium (M) and strong (S) acid sites with its total amount at maximum desorption of NH<sub>3</sub> at temperature ranges of 100 - 300, 300 - 500 and >500 °C, respectively. <sup>e</sup>Amount of CO<sub>2</sub> desorption (mmol/g) was calculated according to the different desorption temperature of CO<sub>2</sub> such as weak (W) at 100 - 300 °C, medium (M) at 300 - 450 °C and strong (S) basic sites at >450 °C, respectively. <sup>f</sup>The molar ratios on the reduced catalysts were measured by XPS analysis.

**Table S2.** Comparisons of catalytic activity of the CZ(0.9)@Z(60)-24 with previously reports concerning CO<sub>2</sub> hydrogenation

| Catalyst                                                               | Reaction conditions |                                |         | X <sub>CO2</sub><br>(%) | Selectivity (%) |      |                    |      |               | Productivity <sup>c</sup><br>(g/(g <sub>Cu</sub> ·h)) | Ref.                 |
|------------------------------------------------------------------------|---------------------|--------------------------------|---------|-------------------------|-----------------|------|--------------------|------|---------------|-------------------------------------------------------|----------------------|
|                                                                        | T (°C)              | Space velocity (SV)            | P (MPa) |                         | HC <sup>b</sup> | CO   | Methanol<br>(MeOH) | DME  | MeOH<br>+ DME |                                                       |                      |
| CZ(0.9)@ZSM(60)-24                                                     | 260                 | 3000 ml/(g·h)                  | 5.0     | 20.8                    | 0.5             | 17.9 | 19.4               | 62.2 | 81.6          | 13.9                                                  | <b>This<br/>Work</b> |
|                                                                        |                     | 3000 ml/(g·h)                  | 3.0     | 17.4                    | 1.4             | 19.4 | 41.4               | 37.8 | 79.2          | 7.1                                                   |                      |
|                                                                        |                     | 6000 ml/(g·h)                  | 5.0     | 10.0                    | 0.9             | 24.9 | 33.5               | 40.7 | 74.2          | 8.8                                                   |                      |
| CuZnOZrO <sub>2</sub> /HZSM5                                           | 240                 | 10000 L/(kg <sub>cat</sub> ·h) | 3.0     | ~14                     | -               | 56   | 12                 | 32   | 44            | 1.4                                                   | [1]                  |
| CIZO-SAPO                                                              | 250                 | 6000 mL/(g <sub>cat</sub> ·h)  | 3.0     | 4.3                     | -               | 32.4 | 7.1                | 60.6 | 67.7          | 0.56                                                  | [2]                  |
| CZZ-MFI                                                                |                     |                                |         | 21.3                    | -               | 46.6 | 12.9               | 40.5 | 53.4          | 1.0                                                   |                      |
| CZZ-MOR                                                                | 260                 | 8800 L/(kg <sub>cat</sub> ·h)  | 5.0     | 23.2                    | -               | 38.1 | 11.2               | 50.8 | 62.0          | 1.0                                                   | [3]                  |
| CZZ-FER                                                                |                     |                                |         | 26.0                    | -               | 31.5 | 12.8               | 55.7 | 68.5          | 1.2                                                   |                      |
| Mh-ZSM5-AlCu                                                           | 260                 | 9000 L/(kg <sub>cat</sub> ·h)  | 3.0     | 4.25                    | -               | -    | 31.0               | 24.4 | 56.4          | 0.26                                                  | [4]                  |
| CZZ&Al-TUD-1                                                           | 260                 | 10000 h <sup>-1</sup>          | 2.0     | ~7                      | -               | ~76  | ~14                | 9.2  | ~24           | 0.27                                                  | [5]                  |
| CuZnZr-FER                                                             | 280                 | 8800 NL/(kg <sub>cat</sub> ·h) | 5.0     | 30                      | -               | 24   | 14                 | 62   | 76            | 3.73                                                  | [6]                  |
| CuOZnOAl <sub>2</sub> O <sub>3</sub> /MCM41                            | 250                 | 40000mL/(g <sub>cat</sub> ·h)  | 4.5     | -                       | -               | 37.3 | 33.6               | 29.1 | 62.7          | 3.30                                                  | [7]                  |
| CuOZnOZrO <sub>2</sub> /WO <sub>x</sub> Al <sub>2</sub> O <sub>3</sub> | 260                 | 65 mL/min                      | 3.0     | 18.9                    | -               | 67.8 | 18.1               | 13.2 | 31.3          | 1.05                                                  | [8]                  |
| Cu <sub>2.4wt%</sub> /Al <sub>2</sub> O <sub>3</sub>                   | 270                 | 30 mL/min                      | 2.5     | 0.9                     | -               | ~58  | ~18                | ~24  | ~42           | 0.4                                                   | [9]                  |

<sup>a</sup>Catalytic performances were obtained at the reference feed gas composition of H<sub>2</sub>/CO<sub>2</sub> = 3. <sup>b</sup>HC represents hydrocarbons products. <sup>c</sup>Productivity for DME and methanol (MeOH) was presented with the unit of (g/(g<sub>Cu</sub>·h)).

**Table S3.** Catalytic performances of the hybridized reference CZ@Si and ZSM-5 catalysts with different preparation methods

| Catalyst <sup>a</sup> | $X_{\text{CO}_2}$ (mol%) | Product distribution (mol%) |      |          |      |
|-----------------------|--------------------------|-----------------------------|------|----------|------|
|                       |                          | CO                          | HC   | Methanol | DME  |
| CZ@Si                 | 17.7                     | 31.2                        | 9.0  | 59.8     | 0    |
| CZ@Si/ZSM-5(1/1)      | 23.1                     | 41.5                        | 4.7  | 30.2     | 23.6 |
| CZ@Si/ZSM-5(1/2)      | 13.1                     | 47.6                        | 36.2 | 11.6     | 4.6  |
| CZ(0.9)@Z(60)-24      | 20.8                     | 17.9                        | 0.5  | 19.4     | 62.2 |
| CZ(0.9)/ZSM-5(60)     | 12.5                     | 34.5                        | 0.5  | 34.2     | 30.8 |

<sup>a</sup>CO<sub>2</sub> conversion ( $X_{\text{CO}_2}$ ) and product distribution (selectivity to CO, hydrocarbons (HC, mainly CH<sub>4</sub>), methanol and dimethyl ether (DME)) were measured at the reaction condition of T = 260 °C, P = 5.0 MPa, space velocity (SV) = 3000 mL/(g<sub>cat</sub>·h) with a feed gas of CO<sub>2</sub>/H<sub>2</sub>/N<sub>2</sub> = 72/24/4. The CZ@Si/ZSM-5(1/1 or 1/2) represents the Cu-ZnO(0.9) nanoparticles-encapsulated with SiO<sub>2</sub> shells and physically mixed with the ZSM-5(60) zeolite at different CZ@Si/ZSM-5 ratio of 1/1 or 1/2. The CZ(0.9)/ZSM-5(60) represented the hybridized catalyst prepared by a simple wet impregnation method. The data were presented with steady state values when they were stabilized after its initial induction period.

## References

- 1 F. Frusteri, G. Bonura, C. Cannilla, G. D. Ferrante, A. Aloise, E. Catizzone, M. Migliori, G. Giordano, *Appl. Catal. B: Environ.*, 2015, **176**, 522-531.
- 2 L. Yao, X. Shen, Y. Pan, Z. Peng, *Energy Fuels*, 2020, **34**, 8635-8643.
- 3 F. Frusteri, M. Migliori, C. Cannilla, L. Frusteri, E. Catizzone, A. Aloise, G. Giordano, G. Bonura, *J. CO<sub>2</sub> Util.*, 2017, **18**, 353-361.
- 4 M. Kosari, K. Lee, C. Wang, S. Rimaz, S. Zhou, E. Hondo, S. Xi, A. M. Seayad, H. C. Zeng, A. Borgna, *Chem. Eng. J.*, 2023, **470**, 144196.
- 5 Q. Jiang, Y. Liu, T. Dintzer, J. Luo, K. Parkhomenko, A. C. Roger, *Appl. Catal. B: Environ.*, 2020, **269**, 118804.
- 6 G. Bonura, F. Frusteri, C. Cannilla, G. D. Ferrante, A. Aloise, E. Catizzone, M. Migliori, G. Giordano, *Catal. Today*, 2016, **277**, 48-54.
- 7 B. Şeker, A. K. Dizaji, V. Balci, A. Uzun, *Renew. Energy*, 2021, **171**, 47-57.
- 8 Y. Suwannapichat, T. Numpilai, N. Chanlek, K. Faungnawakij, M. Chareonpanich, J. Limtrakul, T. Witoon, *Energy Convers. Manag.* **2018**, 159, 20-29.
- 9 E. Lam, J. J. Corral-Pérez, K. Larmier, G. Noh, P. Wolf, A. Comas-Vives, A. Urakawa, C. Copéret, *Angew. Chem. Int. Ed.*, 2019, **58**, 13989-13996.
